# Supplementary material for: Efficient biosynthesis of 5-aminolevulinic acid from glutamate via whole-cell biocatalyst in immobilized engineered Escherichia coli
Source: Royal Society of Chemistry journal article supplement (doi:10.1039/d2cy02172b), 2023-01-01
Supplement: d2cy02172b1.pdf [file d2cy02172b1.pdf]

Supplementary information for:

**Efficient biosynthesis of 5-aminolevulinic acid from glutamate via whole-cell biocatalyst in immobilized engineered *Escherichia coli***

Ying Luo, Liang Liu, Jinshui Yang, Anping Su, Qijun Yu, Entao Wang and Hongli Yuan\*

State Key Laboratory of Agrobiotechnology and Key Laboratory of Soil Microbiology, Ministry of Agriculture, College of Biological Sciences, China Agricultural University, Beijing, 100193, China.

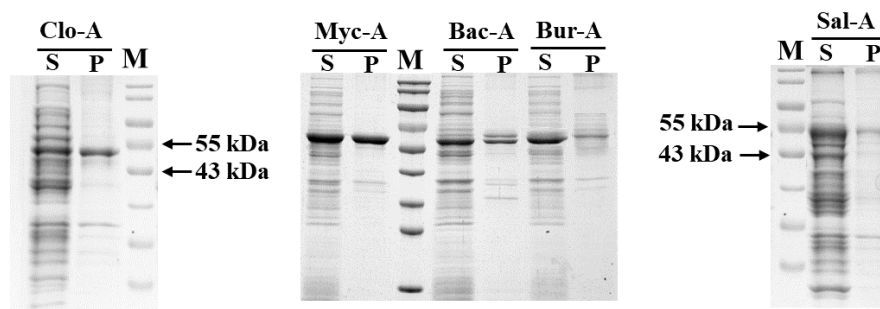

Figure S1. SDS-PAGE analysis of protein expression at 12 h and Hema is indicated by the arrow. S stands for soluble proteins, while P is the insoluble in the pellet. M is the protein marker with the corresponding molecular weight (kDa) beside the bands. The size of Hema protein from *C. beijerinckii*, *M. diernhoferi*, *B. cereus*, *Burkholderia caryophylli* and *S. typhimurium* is 46.92 kDa, 48.23 kDa, 49.28 kDa, 47.87 kDa, and 46.12 kDa, respectively.

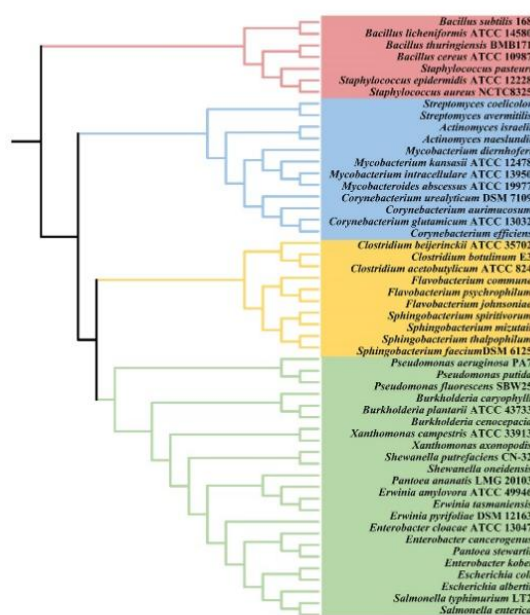

Figure S2 Phylogenetic tree based on merged sequences of GltX and Hema. The tree

was constructed based on amino acid sequences from 51 various bacterial organisms

**Table S1 Plasmids used in this study**

| Plasmids                                            | Relevant characteristics                                                                                                               | Sources   |
|-----------------------------------------------------|----------------------------------------------------------------------------------------------------------------------------------------|-----------|
| pET30a                                              | pBR322 ori, T7 promoter, Km <sup>r</sup> , <i>E. coli</i> expression vector                                                            | This work |
| pET30a- <i>ClohemA</i>                              | pET30a containing <i>hemA</i> gene ( <i>C. beijerinckii</i> )                                                                          | This work |
| pET30a- <i>MychemA</i>                              | pET30a containing <i>hemA</i> gene ( <i>M. diernhoferi</i> )                                                                           | This work |
| pET30a- <i>BachemA</i>                              | pET30a containing <i>hemA</i> gene ( <i>Bacillus cereus</i> )                                                                          | This work |
| pET30a- <i>BurhemA</i>                              | pET30a containing <i>hemA</i> gene ( <i>Burkholderia caryophylli</i> )                                                                 | This work |
| pET30a- <i>SalhemA</i>                              | pET30a containing <i>hemA</i> gene ( <i>S. typhimurium</i> )                                                                           | This work |
| pET30a- <i>ClohemA-gltX-tRNA<sup>Glu</sup></i>      | pET30a containing <i>hemA</i> , <i>gltX</i> and tRNA <sup>Glu</sup> gene ( <i>C. beijerinckii</i> )                                    | This work |
| pET30a- <i>MychemA-gltX-tRNA<sup>Glu</sup></i>      | pET30a containing <i>hemA</i> , <i>gltX</i> and tRNA <sup>Glu</sup> gene ( <i>M. diernhoferi</i> )                                     | This work |
| pET30a- <i>BachemA-gltX-tRNA<sup>Glu</sup></i>      | pET30a containing <i>hemA</i> , <i>gltX</i> and tRNA <sup>Glu</sup> gene ( <i>Bacillus cereus</i> )                                    | This work |
| pET30a- <i>BurhemA-gltX-tRNA<sup>Glu</sup></i>      | pET30a containing <i>hemA</i> , <i>gltX</i> and tRNA <sup>Glu</sup> gene ( <i>Burkholderia caryophylli</i> )                           | This work |
| pET30a- <i>SalhemA-gltX-tRNA<sup>Glu</sup></i>      | pET30a containing <i>hemA</i> , <i>gltX</i> and tRNA <sup>Glu</sup> gene ( <i>S. typhimurium</i> )                                     | This work |
| pET30a- <i>BurhemA-tRNA<sup>Glu</sup>-SalhemL</i>   | pET30a containing <i>hemA</i> , tRNA <sup>Glu</sup> ( <i>Burkholderia caryophylli</i> ) and <i>gltX</i> gene ( <i>S. typhimurium</i> ) | This work |
| pET30a- <i>ClohemA-gltX-hemL-tRNA<sup>Glu</sup></i> | pET30a containing <i>hemA</i> , <i>gltX</i> , <i>hemL</i> and tRNA <sup>Glu</sup> gene ( <i>C. beijerinckii</i> )                      | This work |
| pET30a- <i>MychemA-gltX-hemL-tRNA<sup>Glu</sup></i> | pET30a containing <i>hemA</i> , <i>gltX</i> , <i>hemL</i> and tRNA <sup>Glu</sup> gene ( <i>M. diernhoferi</i> )                       | This work |
| pET30a- <i>BachemA-gltX-hemL-tRNA<sup>Glu</sup></i> | pET30a containing <i>hemA</i> , <i>gltX</i> , <i>hemL</i> and tRNA <sup>Glu</sup> gene ( <i>Bacillus cereus</i> )                      | This work |
| pET30a- <i>BurhemA-gltX-hemL-tRNA<sup>Glu</sup></i> | pET30a containing <i>hemA</i> , <i>gltX</i> , <i>hemL</i> and tRNA <sup>Glu</sup> gene ( <i>Burkholderia caryophylli</i> )             | This work |
| pET30a- <i>SalhemA-gltX-hemL-tRNA<sup>Glu</sup></i> | pET30a containing <i>hemA</i> , <i>gltX</i> , <i>hemL</i> and tRNA <sup>Glu</sup> gene ( <i>S. typhimurium</i> )                       | This work |

|         |                                                                      |                                                                                                                                                                                                                                                                          |           |
|---------|----------------------------------------------------------------------|--------------------------------------------------------------------------------------------------------------------------------------------------------------------------------------------------------------------------------------------------------------------------|-----------|
| pAtSSL0 | (pET30a- <i>Burhema</i> -tRNA <sup>Glu</sup> - <i>SalgltX-hemL</i> ) | pET30a containing <i>hemA</i> ( <i>Burkholderia caryophylli</i> ) <i>gltX</i> and <i>hemL</i> ( <i>S. typhimurium</i> ) located tandemly in one operon and tRNA <sup>Glu</sup> ( <i>Burkholderia caryophylli</i> ) located in one operon                                 | This work |
| pAtSSL1 |                                                                      | pET30a containing <i>hemA</i> ( <i>Burkholderia caryophylli</i> ) and <i>gltX</i> ( <i>S. typhimurium</i> ) located tandemly in one operon, <i>hemL</i> ( <i>S. typhimurium</i> ) and tRNA <sup>Glu</sup> ( <i>Burkholderia caryophylli</i> ) with two separated operons | This work |
| pAtSSL2 |                                                                      | pET30a containing <i>gltX</i> and <i>hemL</i> ( <i>S. typhimurium</i> ) located tandemly in one operon, <i>hemA</i> and tRNA <sup>Glu</sup> ( <i>Burkholderia caryophylli</i> ) with two separated operons                                                               | This work |
| pAtSSL3 |                                                                      | pET30a containing <i>hemA</i> ( <i>Burkholderia caryophylli</i> ) and <i>hemL</i> ( <i>S. typhimurium</i> ) located tandemly in one operon, <i>gltX</i> ( <i>S. typhimurium</i> ) and tRNA <sup>Glu</sup> ( <i>Burkholderia caryophylli</i> ) with two separated operons | This work |
| pAtSSL4 |                                                                      | pET30a containing <i>hemA</i> ( <i>Burkholderia caryophylli</i> ) <i>gltX</i> and <i>hemL</i> ( <i>S. typhimurium</i> ) located tandemly in one operon and tRNA <sup>Glu</sup> ( <i>Burkholderia caryophylli</i> ) with four separated operons                           | This work |

**Table S2. Primers used in this study**

| Primer | Sequence (5'-3')                                        | Relevance                                            |
|--------|---------------------------------------------------------|------------------------------------------------------|
| CloA-F | ccatggctgatatcgatccGTGATAGGCTTAATAGGCATAAGAA            |                                                      |
| CloA-R | cggagctcgaattcgggaCTATTCCTTCGTCATAAATATTTTC             |                                                      |
| MycA-F | ccatggctgatatcgatccGTGAGCGTGCTGCTATTCG                  | pET30a- <i>ClohemA</i> ,                             |
| MycA-R | cggagctcgaattcgggaCTACAACCTCAGGCTTGTCGTTC               | pET30a- <i>MychemA</i> ,                             |
| BacA-F | ccatggctgatatcgatccGTGCATATTCTTGTTGTAGTGTA              | pET30a- <i>BachemA</i> ,                             |
| BacA-R | tcgagtgcggccgcaagcttTTATAAAGATGGAACGGATGGTGT            | pET30a- <i>Burhema</i> ,                             |
| BurA-F | ccatggctgatatcgatccATGCAACTGCTTACGATCGGAAT              | pET30a- <i>SalhemA</i>                               |
| BurA-R | cggagctcgaattcgggaCTAATGATCGGAGGGATCGGA                 | construction                                         |
| SalA-F | ccatggctgatatcgatccATGACCCTTTTAGCGCTCGGTA               |                                                      |
| SalA-R | tcgagtgcggccgcaagcttCTACTCCAGCCCGAGGCT                  |                                                      |
| CloS-F | atccgaattcagctcGAAGGAGATATACATATGAGTTTTGAAAAATTAGCAGATA | pET30a- <i>ClohemA-gltX</i> -tRNA <sup>Glu</sup> ,   |
| CloS-R | tggtggtggtgctcgcagTTATATATTTAAAAATTTATCAAAT             | pET30a- <i>MychemA-gltX</i> -tRNA <sup>Glu</sup> ,   |
| MycS-F | cgagctccgctcacaagcttGAAGGAGATATACATGTTCGATTCCGTCGGTCC   | pET30a- <i>BachemA-gltX</i> -tRNA <sup>Glu</sup> ,   |
| MycS-R | tcgagtgcggccgcaagcTCACACCCACCCCGTAC                     | pET30a- <i>Burhema-gltX</i> -tRNA <sup>Glu</sup> ,   |
| BacS-F | ttataaaagcttgcGAAGGAGATATACATATGGAAGGTGTACCAATTATGGAA   | pET30a- <i>Burhema-gltX</i> -tRNA <sup>Glu</sup> and |
| BacS-R | gtgtgctcgcagctcTTAACCAATTACTTTTTGAATACGA                | pET30a- <i>SalhemA-gltX</i> -tRNA <sup>Glu</sup>     |
| BurS-F | ctccgatcattagcgGAAGGAGATATACATGTCCAACGTCCGTACCC         | construction                                         |
| BurS-R | tgtcgacggagctcgaattcTCAGCCGGCGAGCCCTTT                  |                                                      |
| SalS-F | ggagtagaagcttgcGAAGGAGATATACATATGAAAATCAAACCTCGCTTCGCG  |                                                      |

|            |                                                             |                                                                                                                                                                                                                                                                                                                   |                                                      |
|------------|-------------------------------------------------------------|-------------------------------------------------------------------------------------------------------------------------------------------------------------------------------------------------------------------------------------------------------------------------------------------------------------------|------------------------------------------------------|
| SalS-R     | gtggtgctcgagtcTTACTGCTGACTTTCACGCTCG                        |                                                                                                                                                                                                                                                                                                                   |                                                      |
| SalS-F1    | ctccgatcattagcgGAAGGAGATATACATGAAAATCAAACCTCGCTTCGCG        |                                                                                                                                                                                                                                                                                                                   |                                                      |
| SalS-R1    | tgtcgacggagctcgaattcTTACTGCTGACTTTCACGCTCG                  |                                                                                                                                                                                                                                                                                                                   |                                                      |
| tRNA-F     | aaggaatggtgcatgTAATACGACTCACTATAGGGGAATT                    |                                                                                                                                                                                                                                                                                                                   |                                                      |
| tRNA-R     | ccatctccttgcacCAAAAAACCCCTCAAGACCCGT                        |                                                                                                                                                                                                                                                                                                                   |                                                      |
| CloL-F     | atccgaattcgagctcGAAGGAGATATACTTGAAAAACGTTGATATATTTAAAG      | pET30a- <i>ClohemA-gltX-hemL</i> -tRNA <sup>Glu</sup> ,<br>pET30a- <i>MychemA-gltX-hemL</i> -tRNA <sup>Glu</sup> ,<br>pET30a- <i>BachemA-gltX-hemL</i> -tRNA <sup>Glu</sup> ,<br>pET30a- <i>BurhemA-gltX-hemL</i> -tRNA <sup>Glu</sup> ,<br>pET30a- <i>SalhemA-gltX-hemL</i> -tRNA <sup>Glu</sup><br>construction |                                                      |
| CloL-R     | cttgtcgacggagctTTATAAACTCATTTTATTTTCATTT                    |                                                                                                                                                                                                                                                                                                                   |                                                      |
| MycL-F     | ctgagttgtagtccgaattctGAAGGAGATATACATGACAAGCACGGCCGCC        |                                                                                                                                                                                                                                                                                                                   |                                                      |
| MycL-R     | tgtcgacggagctcgaatTCACGGGGTGGCCTCG                          |                                                                                                                                                                                                                                                                                                                   |                                                      |
| BacL-F     | taattggttaagcacGAAGGAGATATACATATGAAAAAGTTTGATAAGTCGATT<br>G |                                                                                                                                                                                                                                                                                                                   |                                                      |
| BacL-R     | tggtggtggtggtgcTTAAGCTTTTAATTTTGACATTGCA                    |                                                                                                                                                                                                                                                                                                                   |                                                      |
| BurL-F     | cgtcgacaagcttgcGAAGGAGATATACATGTCCAGCAACCAAGCCCTTT          |                                                                                                                                                                                                                                                                                                                   |                                                      |
| BurL-R     | gtggtgctcgagtcggccgcTCAGGCCGCGAGCGAG                        |                                                                                                                                                                                                                                                                                                                   |                                                      |
| Sall-F     | gtcagcagtaagcacGAAGGAGATATACATATGAGTAAGTCTGAAAATCTCTAT<br>A |                                                                                                                                                                                                                                                                                                                   |                                                      |
| Sall-R     | tggtggtggtggtgcTTACAGTTTCGCAAACACCCGA                       |                                                                                                                                                                                                                                                                                                                   |                                                      |
| Sall-F1    | ctccgatcattagcgGAAGGAGATATACATGAGTAAGTCTGAAAATCTCTATA       |                                                                                                                                                                                                                                                                                                                   | pAtSSL0 construction                                 |
| Sall-R1    | tgtcgacggagctcgaattcTTACAGTTTCGCAAACACCCGA                  |                                                                                                                                                                                                                                                                                                                   |                                                      |
| PTSall-F   | agaaggagatatacatatgAGTAAGTCTGAAAATCTCTATA                   |                                                                                                                                                                                                                                                                                                                   | pAtSL1, pAtSL2,<br>pAtSL3 and pAtSL4<br>construction |
| PTSall-R   | tgtcgacggagctcgaattcTTACAGTTTCGCAAACACCCGA                  |                                                                                                                                                                                                                                                                                                                   |                                                      |
| PciF       | CCTTTTGCTCACATGTCGATCCCGCGAAATTAATACG                       |                                                                                                                                                                                                                                                                                                                   |                                                      |
| PciR       | AGTCGTATTAACACGGATATAGTTCCTCCTTTCAGC                        |                                                                                                                                                                                                                                                                                                                   |                                                      |
| PciF1      | tgcccttttgtccatgtCGATCCCGCGAAATTAATACG                      |                                                                                                                                                                                                                                                                                                                   |                                                      |
| PciR1      | ctatagtgagtcgtattaacacGGATATAGTTCCTCCTTTCAGC                |                                                                                                                                                                                                                                                                                                                   |                                                      |
| PTSall-F   | agaaggagatatacatATGAAAATCAAACCTCGCTTCGCG                    |                                                                                                                                                                                                                                                                                                                   |                                                      |
| PTSall-R   | tgtcgacggagctcgaattcTTACTGCTGACTTTCACGCTCG                  |                                                                                                                                                                                                                                                                                                                   |                                                      |
| PTSallSL-F | agaaggagatatacatATGAAAATCAAACCTCGCTTCGCG                    |                                                                                                                                                                                                                                                                                                                   |                                                      |
| PTSallSL-R | tgtcgacggagctcgaattcTTACAGTTTCGCAAACACCCGA                  |                                                                                                                                                                                                                                                                                                                   |                                                      |
